# Supplementary material
Source: publisher figshare collection journal article supplement (https://aacr.figshare.com/articles/dataset/_/22383497)
Supplement: Supplementary file 1 [file 39828914]

**Supplementary Table 1. Resource and histological type of lung cancer cell lines**

| Cell line  | Resource Distributor                                | Histology                           |
|------------|-----------------------------------------------------|-------------------------------------|
| NCI-H1781  | ATCC (American Type Culture Collection )            | adenocarcinoma                      |
| NCI-H1373  | ATCC (American Type Culture Collection )            | adenocarcinoma                      |
| LC319      | Aichi Cancer Center                                 | adenocarcinoma                      |
| A549       | ATCC (American Type Culture Collection )            | adenocarcinoma                      |
| PC14       | RIKEN BRC (BioResource Center)                      | adenocarcinoma                      |
| A427       | ATCC (American Type Culture Collection )            | adenocarcinoma                      |
| PC-3       | JCRB (Japanese Collection of Research Bioresources) | adenocarcinoma                      |
| PC-9       | National Cancer Center Hospital, Tokyo, Japan       | adenocarcinoma                      |
| NCI-H1666  | ATCC (American Type Culture Collection )            | adenocarcinoma                      |
| SK-MES-1   | ATCC (American Type Culture Collection )            | squamous cell carcinoma             |
| NCI-H2170  | ATCC (American Type Culture Collection )            | squamous cell carcinoma             |
| NCI-H520   | ATCC (American Type Culture Collection )            | squamous cell carcinoma             |
| NCI-H1703  | ATCC (American Type Culture Collection )            | squamous cell carcinoma             |
| LU61       | Central Institute for Experimental Animals          | squamous cell carcinoma             |
| NCI-H647   | ATCC (American Type Culture Collection )            | squamous cell carcinoma             |
| NCI-H226   | ATCC (American Type Culture Collection )            | squamous cell carcinoma             |
| EBC1       | JCRB (Japanese Collection of Research Bioresources) | squamous cell carcinoma             |
| LX1        | Central Institute for Experimental Animals          | large cell carcinoma                |
| SBC-3      | JCRB (Japanese Collection of Research Bioresources) | small cell carcinoma                |
| SBC-5      | JCRB (Japanese Collection of Research Bioresources) | small cell carcinoma                |
| DMS273     | ECACC (European Collection of Animal Cell Cultures) | small cell carcinoma                |
| DMS114     | ATCC (American Type Culture Collection )            | small cell carcinoma                |
| RERF-LC-AI | JCRB (Japanese Collection of Research Bioresources) | small cell carcinoma                |
| SAEC       | Cambrex Bio Sciences Inc., Walkersville, MD, USA    | Normal Human Small Airway Epithelia |

**Supplementary Table 2. Summary of 262 NSCLC patients**

|                                     | total        |
|-------------------------------------|--------------|
| Patients recruited (n)              | 262          |
| Median (range) age at diagnosis (y) | 65 ( 26-84 ) |
| Sex (female) (%)                    | 88 ( 33.6 )  |
| Current or ex-smoker (%)            | 174 ( 66.4 ) |
| Histological type (n)               |              |
| adenocarcinoma (%)                  | 156 ( 59.5 ) |
| squamous carcinoma (%)              | 88 ( 33.6 )  |
| adenosquamous carcinoma (%)         | 3 ( 1.1 )    |
| large cell carcinoma (%)            | 15 ( 5.7 )   |
| Tumor size (n)                      |              |
| pT1 (%)                             | 111 ( 42.4 ) |
| pT2 (%)                             | 125 ( 47.7 ) |
| pT3 (%)                             | 26 ( 9.9 )   |
| Lymph node status (n)               |              |
| pN0 (%)                             | 204 ( 77.9 ) |
| pN1 (%)                             | 23 ( 8.8 )   |
| pN2 (%)                             | 35 ( 13.4 )  |
| Pathological stage (n)              |              |
| pStage IA (%)                       | 99 ( 37.8 )  |
| pStage IB (%)                       | 90 ( 34.3 )  |
| pStage IIA (%)                      | 5 ( 1.9 )    |
| pStage IIB (%)                      | 26 ( 9.9 )   |
| pStage IIIA (%)                     | 42 ( 16.0 )  |

**Supplementary Table 3A. Association between CDCA5-positivity in NSCLC tissues and patients' characteristics (n = 262)**

|                   | Total<br>n = 262 | CDCA5 positive<br>n = 192(73.3%) | CDCA5 negative<br>n = 70(26.7%) | P-value: positive vs<br>negative |
|-------------------|------------------|----------------------------------|---------------------------------|----------------------------------|
| Age (years)       |                  |                                  |                                 |                                  |
| < 65              | 128(48.9%)       | 98(37.4%)                        | 30(11.5%)                       | 0.2655                           |
| >= 65             | 134(51.1%)       | 94(35.9%)                        | 40(15.3%)                       |                                  |
| Gender            |                  |                                  |                                 |                                  |
| Female            | 88(33.6%)        | 64(24.4%)                        | 24(9.2%)                        | 0.8835                           |
| Male              | 174(66.4%)       | 128(48.9%)                       | 46(17.6%)                       |                                  |
| Smoking           |                  |                                  |                                 |                                  |
| non-smoker        | 88(33.6%)        | 61(23.3%)                        | 27(10.3%)                       | 0.3052                           |
| smoker            | 174(66.4%)       | 131(50.0%)                       | 43(16.4%)                       |                                  |
| Histological type |                  |                                  |                                 |                                  |
| ADC               | 156(59.5%)       | 109(41.6%)                       | 47(17.9%)                       | 0.1552                           |
| non-ADC           | 106(40.4%)       | 83(31.7%)                        | 23(8.8%)                        |                                  |
| pT factor         |                  |                                  |                                 |                                  |
| T1                | 111(42.4%)       | 82(31.3%)                        | 29(11.0%)                       | 0.8884                           |
| T2+T3             | 151(57.6%)       | 110(42.0%)                       | 41(15.6%)                       |                                  |
| pN factor         |                  |                                  |                                 |                                  |
| N0                | 204(77.9%)       | 150(57.3%)                       | 54(20.6%)                       | 0.8675                           |
| N1+N2             | 58(22.1%)        | 42(16.0%)                        | 16(6.1%)                        |                                  |

ADC, adenocarcinoma

non-ADC, squamous-cell carcinoma plus large-cell carcinoma and adenosquamous-cell carcinoma

\*P < 0.05 (Fisher's exact test)

**Supplementary Table 3B. Numbers at risk in NSCLC patients (n)**

|        | total | CDCA5<br>positive | CDCA5<br>negative |
|--------|-------|-------------------|-------------------|
| 1 year | 217   | 157               | 60                |
| 2 year | 142   | 99                | 43                |
| 3 year | 93    | 65                | 28                |
| 4 year | 78    | 53                | 25                |
| 5 year | 56    | 42                | 14                |

**Supplementary Table 3C. Cox's proportional hazards model analysis of prognostic factors in patients with NSCLCs**

| Variables                    | Risk ratio<br>(univariate 95% confidence interval) |               | Unfavorable/Favorable | P-value   |
|------------------------------|----------------------------------------------------|---------------|-----------------------|-----------|
| <b>Univariate analysis</b>   |                                                    |               |                       |           |
| CDCA5                        | 2.266                                              | (1.156-4.442) | Positive / Negative   | 0.0172*   |
| Age ( years )                | 2.132                                              | (1.289-3.527) | >= 65 / 65 >          | 0.0032*   |
| Gender                       | 2.107                                              | (1.183-3.751) | Male / Female         | 0.0114*   |
| Smoking                      | 1.902                                              | (1.094-3.309) | smoker / non-smoker   | 0.0228*   |
| Histological type            | 2.778                                              | (1.682-4.589) | non-ADC/ADC           | < 0.0001* |
| pT factor                    | 4.005                                              | (2.140-7.497) | T2+T3 / T1            | < 0.0001* |
| pN factor                    | 4.405                                              | (2.701-7.182) | N1+N2 / N0            | < 0.0001* |
| <b>Multivariate analysis</b> |                                                    |               |                       |           |
| CDCA5                        | 2.207                                              | (1.108-4.399) | Positive / Negative   | 0.0244*   |
| Age ( years )                | 1.861                                              | (1.106-3.131) | >= 65 / 65>           | 0.0193*   |
| Gender                       | 1.12                                               | (0.526-2.381) | Male / Female         | 0.7693    |
| Smoking                      | 1.275                                              | (0.629-2.586) | smoker / non-smoker   | 0.5006    |
| Histological type            | 1.463                                              | (0.807-2.655) | non-ADC/ADC           | 0.2102    |
| pT factor                    | 2.435                                              | (1.254-4.729) | T2+T3 / T1            | 0.0086*   |
| pN factor                    | 3.554                                              | (2.160-5.847) | N1+N2 / N0            | < 0.0001* |

ADC, adenocarcinoma

non-ADC, squamous-cell carcinoma plus large-cell carcinoma and adenosquamous-cell carcinoma

\*P < 0.05
